# Supplementary material for: Use of folic acid and vitamin supplementation among adults with depression and anxiety: a cross-sectional, population-based survey
Source: Springer Nature journal article supplement (doi:10.1186/1475-2891-10-102), 2011-09-30
Supplement: 12937_2011_428_MOESM2_ESM.pdf [file 12937_2011_428_MOESM2_ESM.pdf]

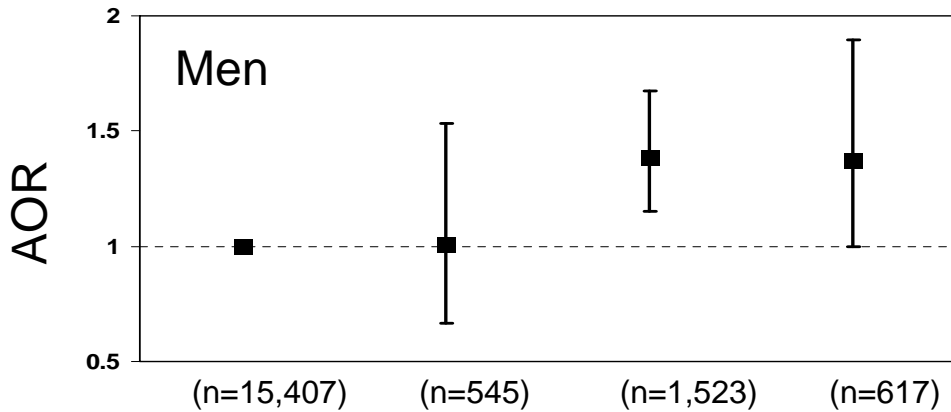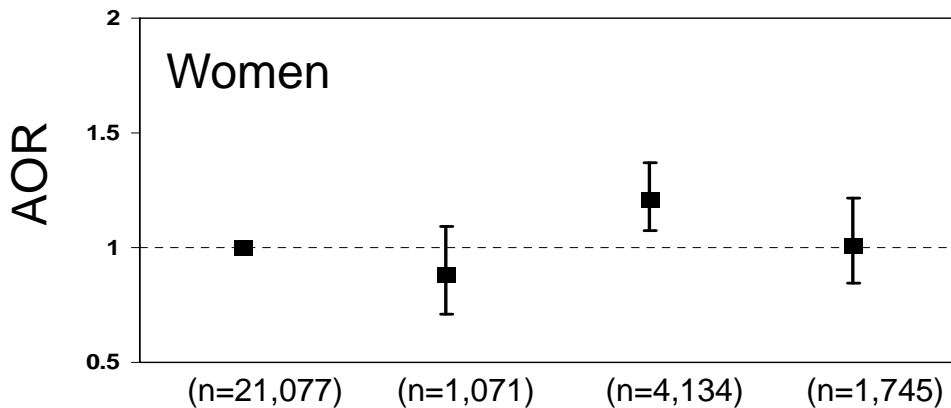

Ever diagnosed depression

no

no

yes

yes

EDS

no

yes

no

yes
